# Supplementary material for: Variation in youth and young adult homicide rates and their association with city characteristics in Latin America: the SALURBAL study
Source: PubMed Central journal article supplement (PMC10033737; doi:10.1016/j.lana.2023.100476), 2023-03-20
Supplement: mmc1.pdf [file mmc1.pdf]

## Supplementary Material to MS34: Variation in youth and young adult homicide rates and their association with city characteristics in Latin America: the SALURBAL study

### Negative Binomial GLMM specification

The “fully adjusted” model in the paper corresponds to

$$Y_{ij}|X_{ij} \sim \text{Negative Binomial}(\mu_{ij}, \phi),$$

where  $Y_{ij}$  is the homicide count of young adults and youth at the  $i$ th sub-city and  $j$ th city,  $i = 1, \dots, I, j = 1, \dots, J$  (there are a total of  $I = 1,205$  subcities and  $J = 315$  cities in the sample). Here,  $X_{ij}$  represents all the conditional information in the model (i.e. exposures, adjustments and random effects) and  $\phi \geq 0$  is a dispersion parameter such that the smaller its value, the smaller the overdispersion is (the limiting case  $\phi \rightarrow +\infty$  corresponds to the Poisson, i.e. equidisperse, case). Since a logarithm link was assumed, the log of the conditional mean  $\mu_{ij}$  satisfies

$$\log(\mu_{ij}) = O_{ij} + \beta_0 + \alpha_i + \alpha_j + \beta_1 A_{ij} + \sum_{k=1}^7 \gamma_k C_{ij}^k + \sum_{l=1}^3 \theta_l S_{ij}^l + \sum_{p=1}^4 \eta_p B_{ij}^p,$$

where  $O_{ij} = \log(N_{ij}/(U_{ij} \cdot 10^5))$  is the model offset ( $U_{ij}$  is the undercounting correction factor and  $N_{ij}$  is the population of young adults and youth in the  $i$ th sub-city and  $j$ th city),  $\beta_0$  is the model intercept,  $\alpha_i$  is a random intercept at the  $i$ th sub-city,  $\alpha_j$  is a random intercept at the  $j$ th city,  $A_{ij}$  is an indicator of age range (0 = youth, 1 = young adults) with coefficient  $\beta_1$ ,  $C_{ij}^k$  are country-level indicators (reference = Peru) with coefficients  $\gamma_k$ ,  $S_{ij}^l$  are the social environment exposures (educational achievement score, GDP and Gini index) at the  $j$ th city with coefficients  $\theta_l$  and  $B_{ij}^p$  are the built environment exposures (isolation of urban patches, aggregation, city size and population growth) at the  $j$ th city with coefficients  $\eta_p$ . Note that the models are stratified by sex, so there is both a “male” and a “female” version of this model.

As stated in the paper, the above definition adopted for the offset  $O_{ij}$  and the use of a logarithmic link allows for modelling the undercounting corrected homicide rates  $R_{ij} = Y_{ij} \cdot U_{ij} 10^5 / N_{ij}$  indirectly as a function of the model outcome  $Y_{ij}$  and the offset  $O_{ij}$  as defined above, since

$$\log(R_{ij}) = \log\left(Y_{ij} \cdot \frac{U_{ij} 10^5}{N_{ij}}\right) = \log(Y_{ij}) + \log\left(\frac{U_{ij} 10^5}{N_{ij}}\right) = \log(Y_{ij}) - O_{ij} \Leftrightarrow \log(Y_{ij}) = \log(R_{ij}) + O_{ij}.$$

Finally, the parameterization used here for the Negative Binomial is

$$P(Y_{ij} = k) = \frac{\Gamma(k + \phi)}{\Gamma(k + 1)\Gamma(\phi)} \left(\frac{\phi}{\phi + \mu_{ij}}\right)^\phi \left(\frac{\mu_{ij}}{\phi + \mu_{ij}}\right)^k, \quad k = 0, 1, \dots$$

where  $\Gamma(x) := \int_0^{+\infty} t^{x-1} e^{-t} dt$  denotes the Gamma function. This parameterization ensures that the conditional expectation of  $Y_{ij}$  given  $X_{ij}$  is  $E(Y_{ij}|X_{ij}) = \mu_{ij}$  and that the corresponding conditional variance is  $V(Y_{ij}|X_{ij}) = \mu_{ij} + \mu_{ij}^2/\phi$ .

### Log-rates clustering analyses model specification

Our model for the logarithm of homicide rates is

$$\log(R_{ijk}) = \beta_0 + \alpha_j + \alpha_k + \varepsilon_{ijk}, \quad \varepsilon_{ijk} \sim iid N(0, \sigma_\varepsilon^2),$$

where  $R_{ijk} = 10^5 \cdot Y_{ijk} \cdot U_{ij} / N_{ijk}$  is the homicide rate at the  $i$ th sub-city,  $j$ th city and  $k$ th country,  $Y_{ijk}$  are the corresponding homicide counts,  $U_{ij}$  is the undercounting correction factor and  $N_{ijk}$  is the population at risk (note that here we are stratifying for sex and have aggregated undercounting-corrected counts and population across both age ranges – young adults and youth). We also assume that  $\alpha_j \sim N(0, \sigma_J^2)$ ,  $\alpha_k \sim N(0, \sigma_K^2)$  and that  $\alpha_j$ ,  $\alpha_k$  and  $\varepsilon_{ijk}$  are all independent of each other for all  $i$ ,  $j$  and  $k$ .

Here, we define the total model variance as

$$\sigma_T^2 := \sigma_I^2 + \sigma_J^2 + \sigma_K^2$$

and therefore the percentage of the variance attributed to subcities, cities and countries are, respectively,

$$\sigma_{subcity}^2 = \frac{\sigma_I^2}{\sigma_T^2} \times 100\%, \quad \sigma_{city}^2 = \frac{\sigma_J^2}{\sigma_T^2} \times 100\%, \quad \sigma_{country}^2 = \frac{\sigma_K^2}{\sigma_T^2} \times 100\%.$$

### Additional methods and results

Table S1 contains the definition, source and geographic unit of each variable used in the paper, Table S2 contains the correspondence between ICD-10 and GHE 2015 codes used for defining (and redistributing) homicide deaths in the main text, Table S3 contains summary statistics (median + IQRs) for all of the variables used in the paper, Figure S1 contains boxplots of the logarithm of homicide rates aggregated over the sample years by country and gender and Figure S2 contains the correlation matrix between all the exposures used in the main (multilevel negative binomial regression) analyses.

**Table S1. Overall structure of the data used in this paper. Each variable was collected and harmonized by SALURBAL’s team based on data from the corresponding source.**

| <b>Variable</b>                                            | <b>Type</b>                                | <b>Availability</b> | <b>Data Source</b>                                    |
|------------------------------------------------------------|--------------------------------------------|---------------------|-------------------------------------------------------|
| Homicide counts for young adults and youth                 | outcome                                    | sub-city            | Vital registration systems                            |
| % of population aged > 25 w/ at least secondary education  | SE exposure (component of education score) | sub-city            | National censuses                                     |
| % of population aged > 25 w/ at least university education | SE exposure (component of education score) | sub-city            | National censuses                                     |
| Gross Domestic Product                                     | SE exposure                                | city                | Gennaioli et al. (2013)                               |
| Income-based Gini index                                    | SE exposure                                | city                | National household surveys                            |
| Area-weighted mean nearest-neighbor distance               | BE exposure (proxy for isolation)          | city                | Global Urban Footprint Project                        |
| Population density                                         | BE exposure (proxy for aggregation)        | city                | Global Urban Footprint Project                        |
| Total population                                           | BE exposure (proxy for city size)          | city                | Population projections                                |
| Population growth                                          | BE exposure (proxy for city growth)        | city                | Population projections                                |
| Age (0 = 25-39 yrs old) (1 = 15-24 yrs old)                | covariate                                  | sub-city            | Created by the authors                                |
| Sex (0 = female) (1 = male)                                | covariate                                  | sub-city            | Created by the authors                                |
| Projected population for young adults and youth            | covariate                                  | sub-city            | Population projections                                |
| Undercounting correction factor                            | covariate                                  | city                | Vital registration systems and population projections |

**Table S2. Correspondence between the codes in the Global Health Estimates (GHE) 2015 version and 4-digit ICD-10 codes within the Tier 2 GHE 2015 category “B. Intentional Injuries”.**

| <b>GHE code</b> | <b>ICD-10 codes</b> | <b>GHE category name</b>   |
|-----------------|---------------------|----------------------------|
| 1570            | X60-X849, Y870      | Self-inflicted injuries    |
| 1580            | X85-Y099, Y871      | Violence                   |
| 1590            | Y36-Y369            | War                        |
| 1600            | Y35-Y359            | Other intentional injuries |

Source: Input dataset: Global Health Estimates 2016: Deaths by Cause, Age, Sex, by Country and by Region, 2000-2016. Geneva, World Health Organization.  
[https://www.who.int/healthinfo/global\\_burden\\_disease/GHE2016\\_Input-Data.7z](https://www.who.int/healthinfo/global_burden_disease/GHE2016_Input-Data.7z)

Note: the corresponding code for the Tier 2 GHE 2015 category “B. Intentional Injuries” is 1560.

**Table S3. Summary statistics of homicide rates (pooled across all years) and social and built environment characteristics in cities, by country.**

| VARIABLES                                                                      | TOTAL            | AR               | BR                | CL               | CO                | MX               | PA               | PE*              | SV                |
|--------------------------------------------------------------------------------|------------------|------------------|-------------------|------------------|-------------------|------------------|------------------|------------------|-------------------|
| <b>Sample characteristics</b>                                                  |                  |                  |                   |                  |                   |                  |                  |                  |                   |
| # of cities                                                                    | 315              | 26               | 152               | 21               | 17                | 92               | 3                | 1                | 3                 |
| # of sub-cities                                                                | 1,205            | 101              | 422               | 81               | 40                | 406              | 82               | 51               | 22                |
| <b>Aggregated homicide rates per 100,000 hab.</b>                              |                  |                  |                   |                  |                   |                  |                  |                  |                   |
| Youth, women (15-24 yo)                                                        | 7.59             | 1.94             | 9.16              | 1.31             | 11.38             | 7.92             | 6.95             | 0.76             | 23.25             |
| Young adults, women (25-39 yo)                                                 | 7.00             | 1.88             | 7.80              | 1.53             | 10.46             | 8.22             | 4.40             | 0.70             | 15.04             |
| Youth, men (15-24 yo)                                                          | 101.00           | 23.56            | 158.38            | 14.61            | 160.05            | 59.97            | 93.61            | 5.18             | 171.30            |
| Young adults, men (25-39 yo)                                                   | 84.46            | 18.02            | 103.06            | 14.85            | 150.68            | 85.68            | 69.77            | 5.92             | 170.64            |
| <b>Subcity homicide rates per 100,000 hab.: medians (interquartile ranges)</b> |                  |                  |                   |                  |                   |                  |                  |                  |                   |
| Youth, women (15-24 yo)                                                        | 4.14<br>(9.49)   | 1.48<br>(2.25)   | 7.20<br>(8.45)    | 0.00<br>(1.86)   | 8.74<br>(7.86)    | 4.26<br>(8.85)   | 0.00<br>(10.49)  | 0.00<br>(0.50)   | 24.90<br>(14.31)  |
| Young adults, women (25-39 yo)                                                 | 4.50<br>(7.81)   | 1.65<br>(1.33)   | 7.20<br>(7.26)    | 1.32<br>(2.86)   | 8.39<br>(6.85)    | 4.72<br>(8.04)   | 0.00<br>(6.50)   | 0.00<br>(0.81)   | 17.73<br>(9.73)   |
| Youth, men (15-24 yo)                                                          | 39.62<br>(83.04) | 16.11<br>(13.32) | 96.53<br>(151.30) | 11.46<br>(12.52) | 96.88<br>(97.11)  | 26.82<br>(35.68) | 57.94<br>(87.68) | 0.00<br>(3.71)   | 172.69<br>(83.31) |
| Young adults, men (25-39 yo)                                                   | 47.82<br>(78.47) | 13.35<br>(12.65) | 80.62<br>(92.12)  | 13.50<br>(12.46) | 106.88<br>(90.36) | 43.60<br>(48.63) | 54.26<br>(64.01) | 2.31<br>(4.59)   | 171.07<br>(68.35) |
| <b>Social environment characteristics: medians (interquartile ranges)</b>      |                  |                  |                   |                  |                   |                  |                  |                  |                   |
| Subcity education (index)                                                      | -0.71<br>(1.72)  | -0.59<br>(1.52)  | -0.61<br>(1.41)   | -1.01<br>(1.20)  | -0.59<br>(1.26)   | -1.19<br>(1.82)  | 0.18<br>(1.88)   | 1.77<br>(2.33)   | -1.70<br>(1.46)   |
| City GDP (x10 <sup>3</sup> 2011 PPP USD)                                       | 14.73<br>(10.55) | 17.47<br>(10.19) | 19.19<br>(12.34)  | 15.47<br>(11.85) | 7.80<br>(4.21)    | 13.00<br>(5.72)  | 24.36<br>(11.37) | 31.26<br>(0.00)  | 6.99<br>(1.52)    |
| City Gini (index)                                                              | 0.50<br>(0.12)   | 0.40<br>(0.05)   | 0.55<br>(0.05)    | 0.40<br>(0.04)   | 0.46<br>(0.03)    | 0.45<br>(0.05)   | 0.50<br>(0.03)   | 0.40<br>(0.00)   | 0.41<br>(0.02)    |
| <b>Built environment characteristics: medians (interquartile ranges)</b>       |                  |                  |                   |                  |                   |                  |                  |                  |                   |
| City Isolation (m)                                                             | 82.43<br>(30.55) | 77.86<br>(20.45) | 80.27<br>(23.05)  | 81.91<br>(28.14) | 85.60<br>(41.94)  | 91.74<br>(41.78) | 71.76<br>(5.89)  | 63.25<br>(0.00)  | 71.32<br>(3.93)   |
| City Population density (x10 <sup>2</sup> hab./km <sup>2</sup> )               | 58.98<br>(27.05) | 51.24<br>(16.37) | 55.33<br>(26.61)  | 64.14<br>(23.96) | 164.39<br>(52.45) | 58.74<br>(18.98) | 73.33<br>(10.85) | 158.43<br>(0.00) | 127.28<br>(18.63) |
| City size (x10 <sup>5</sup> hab.)                                              | 1.51<br>(2.24)   | 1.73<br>(1.98)   | 1.19<br>(1.81)    | 1.10<br>(0.96)   | 2.31<br>(2.69)    | 1.84<br>(3.04)   | 1.14<br>(4.20)   | 47.73<br>(0.00)  | 1.30<br>(4.02)    |
| City Population growth (% over 5 years)                                        | 6.12<br>(4.02)   | 5.92<br>(2.13)   | 5.49<br>(3.66)    | 5.86<br>(2.32)   | 4.75<br>(5.09)    | 7.49<br>(3.28)   | 8.55<br>(2.74)   | 8.12<br>(0.00)   | 7.77<br>(2.31)    |

Footnote: \*The interquartile ranges of city-level Peru variables is 0 due to the sample only having one city (Lima) for this country.

Legend: AR = Argentina, BR = Brazil, CL = Chile, CO = Colombia, MX = Mexico, PA = Panama, PE = Peru, SV = El Salvador, yo = years old, hab = inhabitants, PPP = Purchasing Power Parity, m = meters.

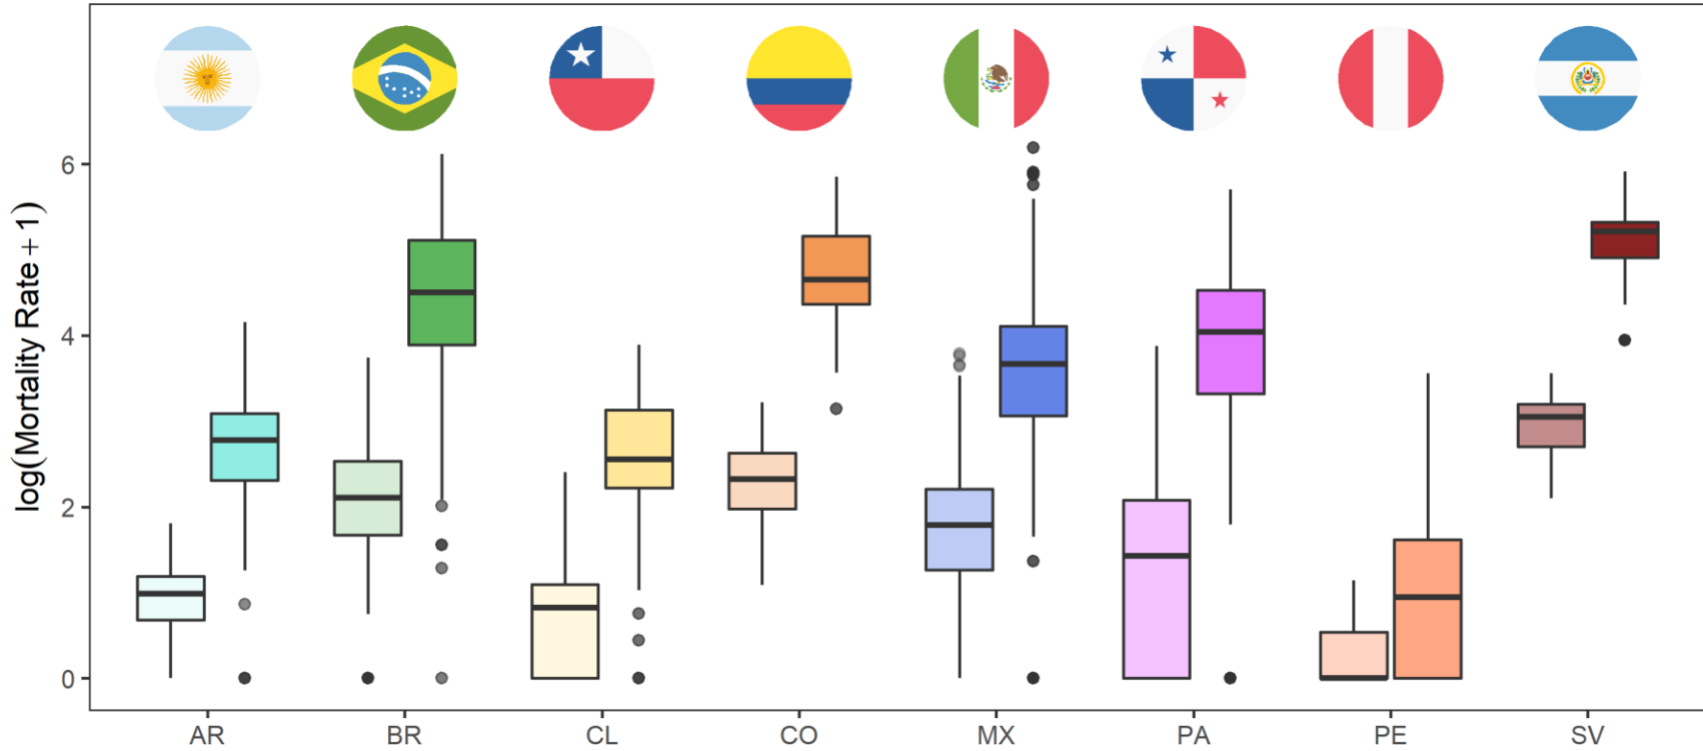

**Figure S1. Boxplots of the logarithm of homicide rates\* aggregated over the sample years by country and sex.**

\*Prior to log-transforming, we added 1 to the homicide rates so that the log-rate equals 0 if the aggregated rates are also 0.

Legend: Solid horizontal lines are the medians, lower and upper hinges are the 1st and 3rd quartiles, lower and upper vertical lines are at least 1.5 times the interquartile range in length and lower and upper dots are outliers and inliers. AR = Argentina, BR = Brazil, CL = Chile, CO = Colombia, MX = Mexico, PA = Panama, PE = Peru, SV = El Salvador. For each country, estimates for women are on the left (softer shades) and estimates for men are on the right (darker shades).

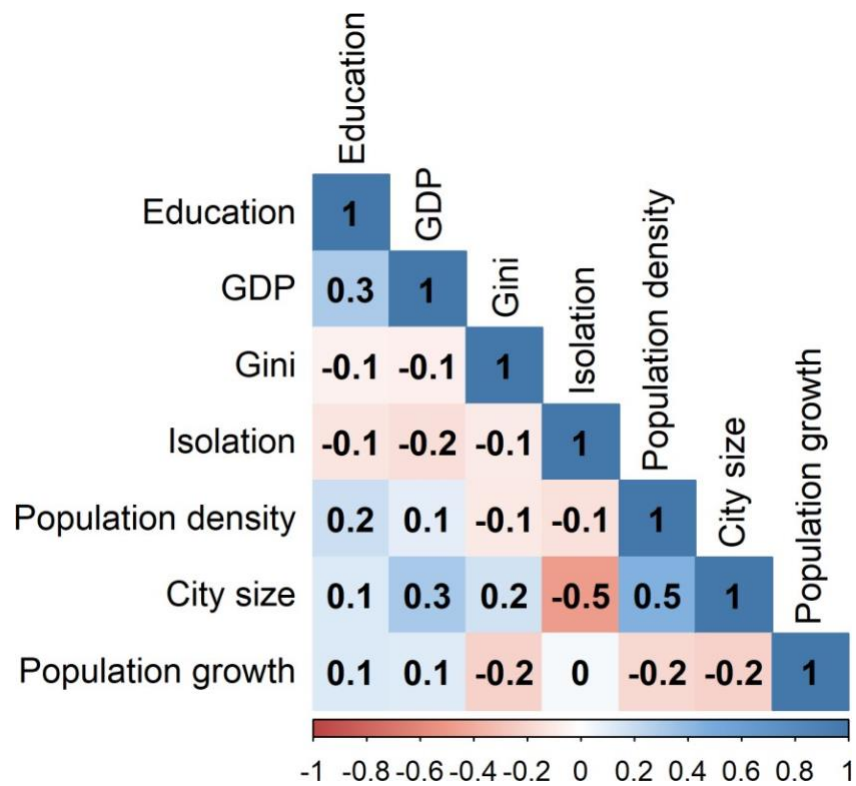

Figure S2. Correlation matrix between all of the exposures used in the main text.
